# Supplementary material for: Elucidating a locus coeruleus-dentate gyrus dopamine pathway for operant reinforcement
Source: eLife. 2023 Apr 21;12:e83600. doi: 10.7554/eLife.83600 (PMC10162798; doi:10.7554/eLife.83600)
Supplement: Figure 3—source data 1. [file elife-83600-fig3-data1.csv]

	Days	eYFP	eYFP	eYFP	eYFP	eYFP	eYFP	eYFP	eYFP	ChR2	ChR2	ChR2	ChR2	ChR2	ChR2	ChR2
Ext 1	1	0.6667	0.0667	1.7667	0	0.7333	0	0	0.033333333	1.2667	1.0667	0.9	0.5333	1.0667	1.7333	0.9
Ext 2	2	0.4667	0.0667	1.5	0.1	0.3	0	0.1	0	0.9667	1.5333	0.5	0.6333	2.0667	2.4	0.5
Ext 3	3	0.3	0.0667	2.3667	0	0.1	0.033333333	0.066666667	0	0.8333	1.8667	1.3333	0.3	1.6667	1.6333	0.8667
Ext 4	4	0.8667	0.1	2.1667	0.0333	0.1667	0.1	0.233333333	0	0.8	1.8333	1.3667	0.7	0.9333	1.0667	0.9
Ext 5	5	0.5667	0.1	2.2	0.0333	0.3333	0.033333333	0	0.033333333	0.6333	2.3667	0.3	2.1	1.4333	1.6333	0.7
Ext 6	6	0.6667	0.0667	0.5333	0	0.0333	0.033333333	0	0	0.6333	2.2333	0.7	1.7	1.8667	1.2	0.8333
Ext 7	7	0.6667	0.0667	0.6667	0	0.3	0.033333333	0	0.033333333	1.6333	0.2	0.5333	0.0667	1.2667	0.6667	0.4
Ext 8	8	0.4333	0.0667	1.1333	0	0.7	0.066666667	0.066666667	0	0.6667	0.8	1.2667	0.6333	0.9	2.8333	0.5
