# Supplementary material for: Elucidating a locus coeruleus-dentate gyrus dopamine pathway for operant reinforcement
Source: eLife. 2023 Apr 21;12:e83600. doi: 10.7554/eLife.83600 (PMC10162798; doi:10.7554/eLife.83600)
Supplement: Figure 3—source data 2. [file elife-83600-fig3-data2.csv]

		ChR2	ChR2	ChR2	ChR2	ChR2	ChR2	ChR2	eYFP	eYFP	eYFP	eYFP	eYFP	eYFP	eYFP	eYFP
FR1 1	1	0.1667	0.3667	0.1	0.0333	0	0	0	0.1333	0.0333	0.0667	0	0.3333	0	0.266666667	0.066666667
FR1 2	2	1.4333	0.2	0.4	0	0	0.0333	0.1	0.1	0.1667	0	0	0.2667	0.066666667	0.766666667	0.033333333
FR1 3	3	1.2667	2.0667	0.1333	0.2333	0.0667	0.1667	0.2	0	0.1333	0	0.0667	0.4333	0.033333333	0.066666667	0
FR1 4	4	1.4	1.8667	0.6	0.4	0.0667	0.2667	0.0333	0.0667	0.4333	0	0.0333	0.4333	0	0.1	0
FR1 5	5	1	1.0333	0.7	0.8333	0.1667	0.7	0.1	0.1333	1	0	0	0.2333	0.066666667	0.166666667	0.1
FR1 6	6	1.3667	2.0333	0.8667	0.3	0.1667	0.9	0.9333	0	0.3333	0	0	0.6	0	0.066666667	0.1
FR1 7	7	1.9667	3.2667	0.3333	0.2667	0.1	0.6667	1.1667	0.0333	0.1333	0.8	0	0.6	0.133333333	0.066666667	0.233333333
FR1 8	8	1.7	1.7667	0.9333	0.3	0.0333	0.4667	0.6667	0	0	1	0	0.5	0	0.066666667	0.066666667
FR3 1	9	1.3667	2.0667	0.7667	0.2	0.0667	0.4333	1.8	0.4333	0	1.9	0	0.4333	0.033333333	0.166666667	0.066666667
FR3 2	10	2.7667	1.5333	0.4	0.5	0.1667	0.7	2.2	0.3333	0	1.5	0	0.3333	0.166666667	0.066666667	0.033333333
FR3 3	11	1.5	2.3	0.4667	0.8333	0.1333	1.5	1.4	0.2333	0.2667	1.2	0	0.7333	0	0.133333333	0
FR3 4	12	1.3667	4.9	0.8667	0.3333	0.1	0.8667	2.1333	0.3333	0.1667	1	0.0333	0.7333	0	0.333333333	0.166666667
FR3 5	13	2.6667	8	0.3667	0.4333	0.2667	0.8	1	0.5667	0.0667	1.2	0	0.3333	0	0.033333333	0.033333333
FR3 6	14	2.8667	6.8333	0.4	0.1667	0.8667	0.4	1.6333	0.4	0.0667	1.4	0	0.0667	0	0.133333333	0.1
FR3 7	15	1.8	2.7	3.6333	0.3667	0.5333	2	1.3333	0.2667	0.0667	1.8	0.0333	1.2333	0	0	0
FR3 8	16	1.8667	3.7667	2.8	0.3333	1.5333	1.1333	1.5333	0.1667	0.5	1.8	0.0333	1.0333	0	0.1	0.033333333
FR5 1	17	1.6667	4.4	2.5	0.0667	0.3	2.0667	1.0667	0.2	0.3	1.8	0	0.3	0.033333333	0.033333333	0
FR5 2	18	3.7	2.7	1.2667	0.1	1.5667	2.3333	1.0333	0.1333	0.3	1.7	0.0333	0.2667	0	0.033333333	0
FR5 3	19	1.6667	2.6667	3.8667	0.2667	2.2333	0.7	1.6333	0.3	0.1	0.7333	0	0.7667	0	0.066666667	0.033333333
FR5 4	20	1.8	2.5	1.8	0.0667	4.1667	0.8	0.8667	0.2667	0.0667	0.7333	0.1333	0.1333	0.033333333	0.1	0.033333333
FR5 5	21	2.6333	5.0667	0.7	3.2	2.3667	2.6	1.1	0.2333	0.0667	1.1667	0	0.3	0	0.066666667	0
FR5 6	22	0.7333	3.2667	1.5667	2.2333	2.1667	3.6667	1.3	0.2	0.2333	1	0.0667	0.1333	0	0.033333333	0
FR5 7	23	1.6333	3.9667	1.1333	0.4333	1.6667	5.0333	1.2333	0.4	0.0667	0.9667	0.0333	0.3667	0	0.033333333	0
FR5 8	24	1.1333	3.0667	0.7667	0.9	2.0333	3.0667	1.3	0.2667	0.0667	1.8333	0.0333	0.2667	0	0.066666667	0.066666667
