# Supplementary material for: Elucidating a locus coeruleus-dentate gyrus dopamine pathway for operant reinforcement
Source: eLife. 2023 Apr 21;12:e83600. doi: 10.7554/eLife.83600 (PMC10162798; doi:10.7554/eLife.83600)
Supplement: Figure 4—source data 3. [file elife-83600-fig4-data3.csv]

Days	Controls	Controls	Controls	Controls	Controls	Controls	Controls	Controls	Controls	Self stim	Self stim	Self stim	Self stim	Self stim
1	0.1	0.03	0.07	0.1	0.07	0	0	0.1	0.03	0.133333333	0.033333333	0.033	0.07	0.07
2	0.13	0.03	0	0.1	0.03	0.03	0.03	0	0	0.2	0.166666667	0.133	0.07	0
3	0	0	0.1	0.07	0.07	0.07	0.07	0.17	0	0.6	0.333333333	0.16	0.1	0
4	0	0	0.07	0.37	0.07	0	0	0	0	0.333333333	0.333333333	0.13	0.3	0.17
5	0	0.03	0.03	0.2	0.07	0.03	0	0	0	0.6	0.2	0.16	0.63	0.17
6	0.066666667	0.1	0.07	0.27	0.03	0	0	0.07	0.03	0.333333333	0.6	0.23	0.53	0.03
7	0.133333333	0.2	0	0.23	0.03	0.03	0	0.03	0	0.2	0.333333333	0.3	0.47	0.43
8	0.066666667	0.1	0.07	0.03	0.03	0.03	0.03	0	0	0.4	0.466666667	0.36	0.3	0.47
