# Supplementary material for: Elucidating a locus coeruleus-dentate gyrus dopamine pathway for operant reinforcement
Source: eLife. 2023 Apr 21;12:e83600. doi: 10.7554/eLife.83600 (PMC10162798; doi:10.7554/eLife.83600)
Supplement: Figure 6—source data 1. [file elife-83600-fig6-data1.xls]

## Sheet: % of GFPcells with probes_avera
Neg probe	Pos probe	D1-Cre probe
3.58178	100	91.1492
7.69231	98.3871	75.5556
0	100	82.6013
		74.9033
		67.5829
		78.2143
		77.4666

## Sheet: Number of punctapercell
Neg probe	Pos probe	D1-Cre probe
1	13	9
1	8	8
0	11	8
		5
		4
		4
		6
