# Supplementary material for: Elucidating a locus coeruleus-dentate gyrus dopamine pathway for operant reinforcement
Source: eLife journal article supplement (doi:10.7554/elife.83600), 2023-04-21
Supplement: supp [file elife_poa_e83600_Figure_2_figure_supplement_1_source_data_1.xls]

## Sheet: PavVSdelayOne day 3
Lever press	Both levers	Lever 1 only	Lever 2 only	Reward	Extension	Non-contingent
10.9375	6.25	3.125	1.5625	3.125	1.5625	1.62602
12.9032	4.83871	0	8.06452	4.83871	0	5.31915
31.8182	22.7273	4.54545	4.54545	4.54545	4.54545	4.34783
20.339	11.8644	1.69491	6.77966	10.1695	10.1695	2.5641
6	3	3	0	2	1	1.04167

## Sheet: place modulation day 3
Open field	FR1	FR3	FR5	ext	non-contingent	switch	delay
26.3158	11.5385	22.2222	42.4242	16.3265	16.2602	18.75	26.5625
23.913	22.9167	20	18.8679	24.3902	25.5319	21.2121	11.2903
32.2581	55	29.6296	50	41.9355	43.4783	61.9048	54.5455
43.3962	35.1064	27.5	38.6667	45.1613	25.641	31.4815	20.339
26.6667	28.2609	27.2727	12.2807	15.1163	22.9167	20.9677	42
