# Supplementary material for: Elucidating a locus coeruleus-dentate gyrus dopamine pathway for operant reinforcement
Source: eLife journal article supplement (doi:10.7554/elife.83600), 2023-04-21
Supplement: supp [file elife_poa_e83600_Figure_5_source_data_1.xls]

## Sheet: First press
	FR1	FR1	FR1	FR1	FR1	FR3	FR3	FR3	FR3	FR3	FR5	FR5	FR5	FR5	FR5
1	15	0	6.45161	2.43902	0	15.3846	9.25926	0	6.66667	3.125	9.375	16.4835	8	1.02041	2.32558
2	9.52381	10.4167	11.5385	7.07071	20	7.40741	9.85915	13.0435	1.33333	15.1515	21.4286	17.9245	14.8148	4	1.75439
3	11.5385	8.33333	0	13.8298	8.69565	11.1111	16	7.40741	11.25	6.06061	18.1818	21.6981	17.8571	10.6667	5.26316

## Sheet: Pav_FR_Day1
non-contingent	Press 1	Press 2	Press 3	Press 4	Press 5
0	9.375	12.5	15.625	18.75	21.875
0	16.4835	17.5824	14.2857	12.0879	23.0769
4.34783	8	12	8	8	8
3.75	1.02041	3.06122	2.04082	2.04082	0
1.04167	2.32558	9.30232	4.65116	2.32558	6.97674

## Sheet: Pav_FR_Day2
non-contingent	Press 1	Press 2	Press 3	Press 4	Press 5
0	21.4286	17.8571	21.4286	28.5714	21.4286
7.69231	17.9245	15.0943	18.8679	21.6981	25.4717
6.25	14.8148	11.1111	3.7037	22.2222	22.2222
1.5625	4	3	3	4	3
0	1.75439	3.50877	3.50877	5.26316	1.75439

## Sheet: Pav_FR_Day3
non-contingent	Press 1	Press 2	Press 3	Press 4	Press 5
1.62602	18.1818	30.303	30.303	30.303	33.3333
5.31915	21.6981	19.8113	13.2075	13.2075	14.1509
4.34783	17.8571	28.5714	21.4286	21.4286	21.4286
2.5641	10.6667	10.6667	10.6667	12	6.66667
1.04167	5.26316	0	0	1.75439	3.50877

## Sheet: Press rate
Days	FR1	FR1	FR1	FR1	FR1	FR3	FR3	FR3	FR3	FR3	FR5	FR5	FR5	FR5	FR5	Ext	Ext	Ext	Ext	Ext
1	0.469808	0.22152	1.67153	2.16926	0	4.16875	4.00588	7.49484	5.02552	5.75269	7.47332	6.02458	15.1658	10.1258	9.93495	19.1063	3.04881	18.2467	11.3833	18.4495
2	0.634008	0.249436	3.14864	2.23325	0.26682	3.23908	3.77874	6.88145	7.36102	3.39073	10.2106	4.04645	13.9192	10.6974	9.75532	12.5184	13.7889	4.27035	14.4666	16.0648
3	0.750838	1.10884	1.59517	1.54547	1.27564	6.40278	3.36523	6.69886	7.14273	4.88958	5.62737	7.13894	10.7018	5.64274	11.1399	10.9346	1.42616	3.78596	4.19577	6.75974
